# Supplementary material for: A Web-Based Program Improves Physical Activity Outcomes in a Primary Care Angina Population: Randomized Controlled Trial
Source: PubMed Central journal article supplement (PMC4180351; doi:10.2196/jmir.3340), 2014-09-12
Supplement: jmir_v16i9e186_app1.pdf [file jmir_v16i9e186_app1.pdf]

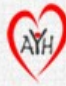

# ACTIVATE **YOUR** HEART

## NEW ACCOUNT SETUP

### SECTION ONE Personal Information

Please take a few moments to complete this registration page. Your responses will help us to tailor the Activate Your Heart programme to best meet your needs. Your responses will be kept confidential.

#### ii. CONTACT DETAILS

##### 1 Title

##### 2 First Name

##### 3 Surname / Family Name

##### 4 Email Address

#### SECTION ONE

### Personal Information

i. [Account Details](#)

ii. [Contact Details](#) >

iii. [About Yourself](#)

#### SECTION TWO

### Risk Factors

i. [Exercise](#)

ii. [Diet](#)

iii. [Stress](#)

iv. [Smoking](#)

v. [Family History](#)

#### SECTION THREE

### Medical Information
