# Supplementary material for: A Web-Based Program Improves Physical Activity Outcomes in a Primary Care Angina Population: Randomized Controlled Trial
Source: PubMed Central journal article supplement (PMC4180351; doi:10.2196/jmir.3340), 2014-09-12
Supplement: jmir_v16i9e186_app6.pdf [file jmir_v16i9e186_app6.pdf]

## Ask the Expert

> This is a private messaging facility where you can get advice from a healthcare professional.

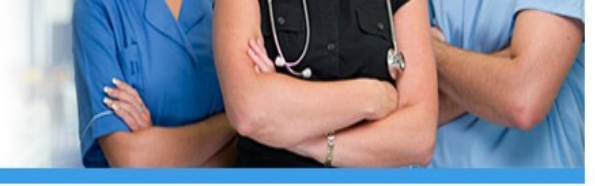

WRITE A NEW MESSAGE

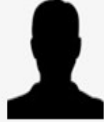

SEND
